# Supplementary material
Source: publisher site journal article supplement (https://www.dovepress.com/get_supplementary_file.php?f=453199.docx)
Supplement: Supplementary file 1 [file get_supplementary_file.php]

**Supplemental information**

**Self-amplified pH/ROS dual-responsive co-delivery nano-system with chemo-photodynamic combination therapy in hepatic carcinoma treatment**


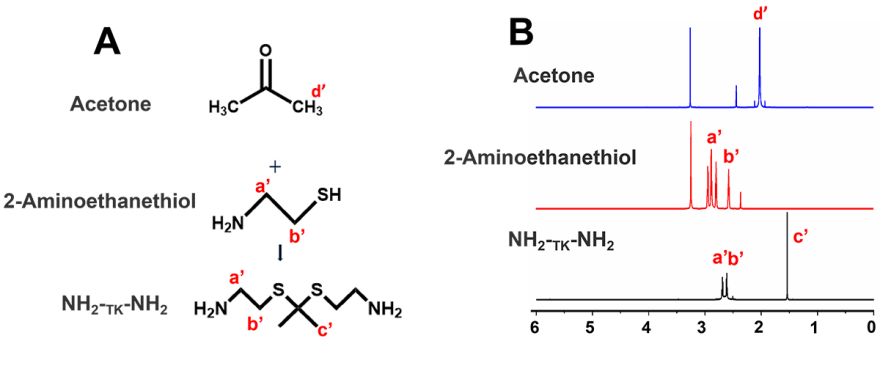


**Figure S1** Synthetic route (**A**) and 1H-NMR spectrum (**B**) of NH2-TK-NH2.


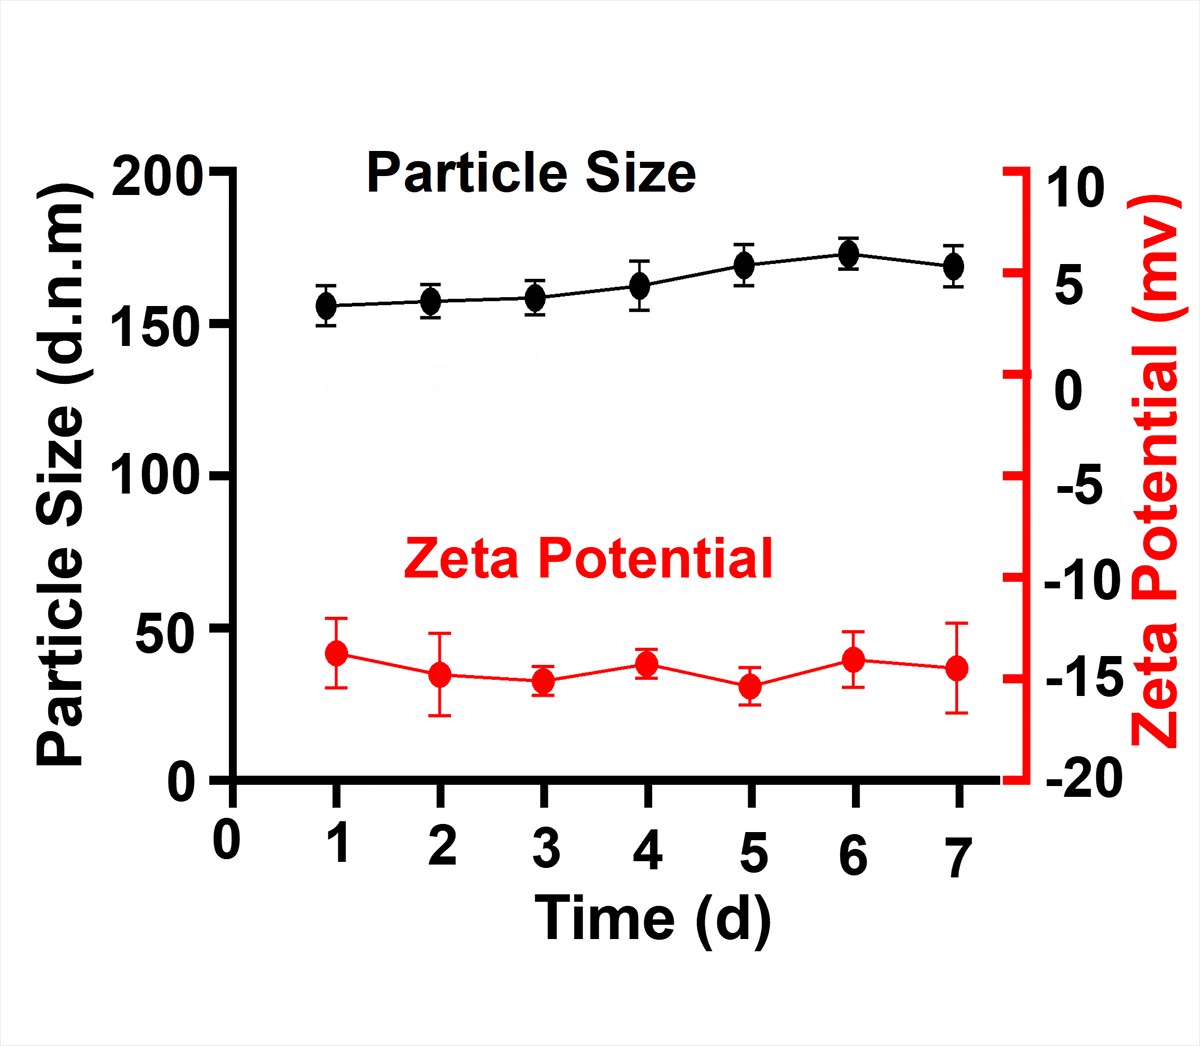


**Figure S2** Storage stability at 4°C for 7 d.


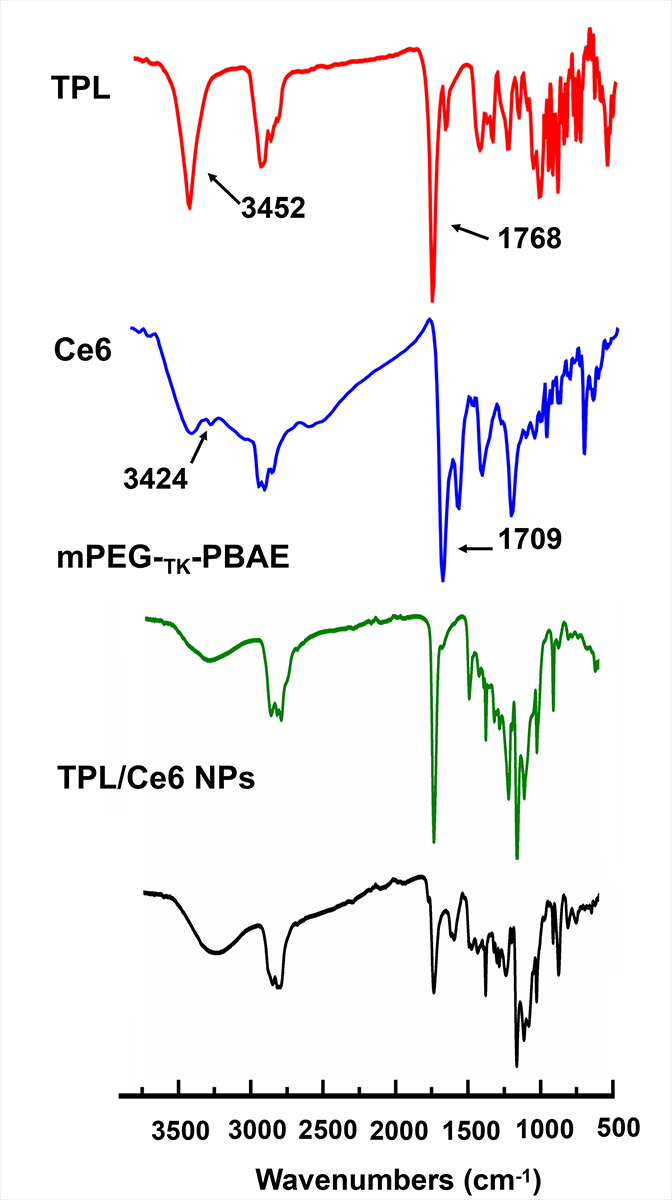


**Figure S3** FT-IR spectra of TPL/Ce6 NPs, mPEG-TK-PBAE polymer and the payload agents.
